# Supplementary material for: Spatial and temporal patterns of sound production in East Greenland narwhals
Source: PubMed Central journal article supplement (PMC5999075; doi:10.1371/journal.pone.0198295), 2018-06-13
Supplement: pone.0198295.s011.pdf [file pone.0198295.s011.pdf]

**S1 Table. Percentage time spent in 17 50-m depth bins, for all whales.** Values were calculated from the moment the whales started echolocating (see Table 2) until the end of their record (see Table 1).

| <b>Depth bin (m)</b> | <b>Freya</b> | <b>Mára</b> | <b>Thora</b> | <b>Frida</b> | <b>Eistla</b> | <b>Balder</b> |
|----------------------|--------------|-------------|--------------|--------------|---------------|---------------|
| 0-50                 | 61.67        | 30.10       | 69.95        | 85.84        | 57.62         | 65.98         |
| 50-100               | 5.90         | 7.27        | 4.72         | 3.67         | 4.03          | 7.34          |
| 100-150              | 4.79         | 8.59        | 2.89         | 3.03         | 3.17          | 4.15          |
| 150-200              | 4.82         | 10.22       | 2.16         | 2.22         | 3.04          | 2.78          |
| 200-250              | 4.02         | 8.87        | 2.09         | 1.68         | 3.25          | 3.42          |
| 250-300              | 4.38         | 5.89        | 2.80         | 1.08         | 3.82          | 3.10          |
| 300-350              | 4.66         | 9.64        | 3.96         | 0.98         | 4.34          | 3.05          |
| 350-400              | 3.50         | 8.10        | 3.09         | 0.84         | 5.29          | 3.23          |
| 400-450              | 2.49         | 2.89        | 2.21         | 0.47         | 3.95          | 2.77          |
| 450-500              | 1.66         | 2.01        | 2.56         | 0.14         | 4.45          | 2.12          |
| 500-550              | 1.05         | 4.46        | 1.90         | 0.05         | 3.06          | 1.23          |
| 550-600              | 0.67         | 1.96        | 0.92         | 0.00         | 1.31          | 0.52          |
| 600-650              | 0.35         | 0.00        | 0.33         | 0.00         | 0.94          | 0.17          |
| 650-700              | 0.03         | 0.00        | 0.26         | 0.00         | 0.76          | 0.02          |
| 700-750              | 0.00         | 0.00        | 0.08         | 0.00         | 0.71          | 0.03          |
| 750-800              | 0.00         | 0.00        | 0.06         | 0.00         | 0.19          | 0.05          |
| 800-850              | 0.00         | 0.00        | 0.02         | 0.00         | 0.06          | 0.04          |
